# Supplementary material for: Chemical characterization of the Punta de Fuencaliente CO 2 -enriched system (La Palma, NE Atlantic Ocean): a new natural laboratory for ocean acidification studies
Source: Copernicus journal article supplement (doi:10.5194/bg-18-1673-2021), 2021-03-09
Supplement: Supplementary file 1 [file bg-18-1673-2021-supplement.zip]

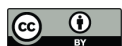

## *Supplement of*

# **Chemical characterization of the Punta de Fuencaliente CO<sub>2</sub>-enriched system (La Palma, NE Atlantic Ocean): a new natural laboratory for ocean acidification studies**

**Sara González-Delgado et al.**

*Correspondence to:* Sara González-Delgado ([sgonzald@ull.edu.es](mailto:sgonzald@ull.edu.es))

- [bg-18-1673-2021-supplement-title-page.pdf](#)
- [S1\\_Punta de Fuencaliente System.kml](#)
- [S2\\_Chemistry data\\_Fuencaliente.xlsx](#)

The copyright of individual parts of the supplement might differ from the CC BY 4.0 License.
